# Supplementary material for: Effect of phase transition temperature of liposomes on preparation of fullerene-encapsulated liposomes by the fullerene-exchange reaction
Source: Royal Society of Chemistry journal article supplement (doi:10.1039/b926949e), 2010-01-01
Supplement: b926949e.pdf [file b926949e.pdf]

## Supplementary Information

# Effect of Phase Transition Temperature of Liposomes on Preparation of Fullerene-Encapsulated Liposomes by the Fullerene-Exchange Reaction

Atsushi Ikeda,\* Yoshihiko Kawai, Jun-ichi Kikuchi and Motofusa Akiyama

*Graduate School of Materials Science, Nara Institute of Science and Technology, 8916-5 Takayama, Ikoma, Nara 630-0192, Japan.*

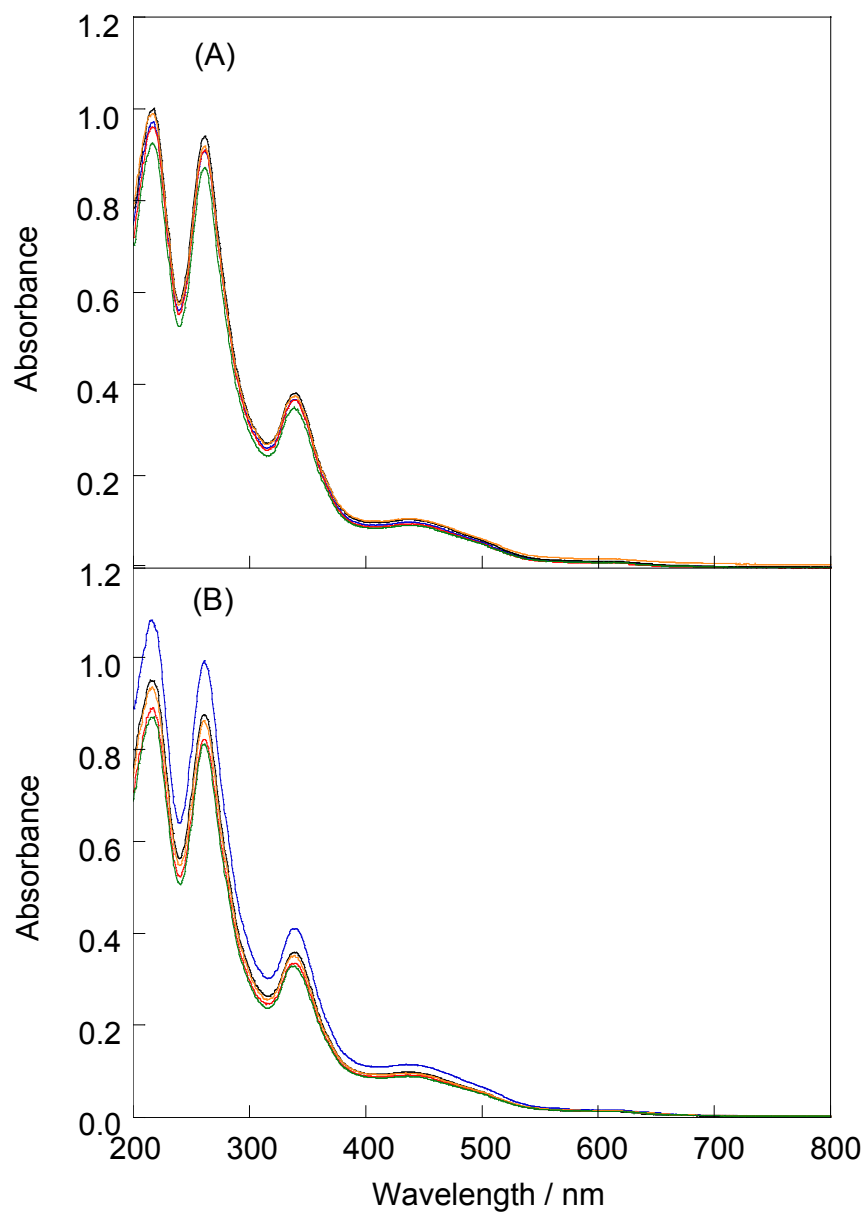

**Fig. S1** UV-vis absorption spectra of LMIC<sub>60</sub> in (A) DMPC- and (B) DPPC-liposomes after the incubation times of 0 (blue line), 1 (black line), 24 (red line), 48 (orange line) and 72 h (yellow line).

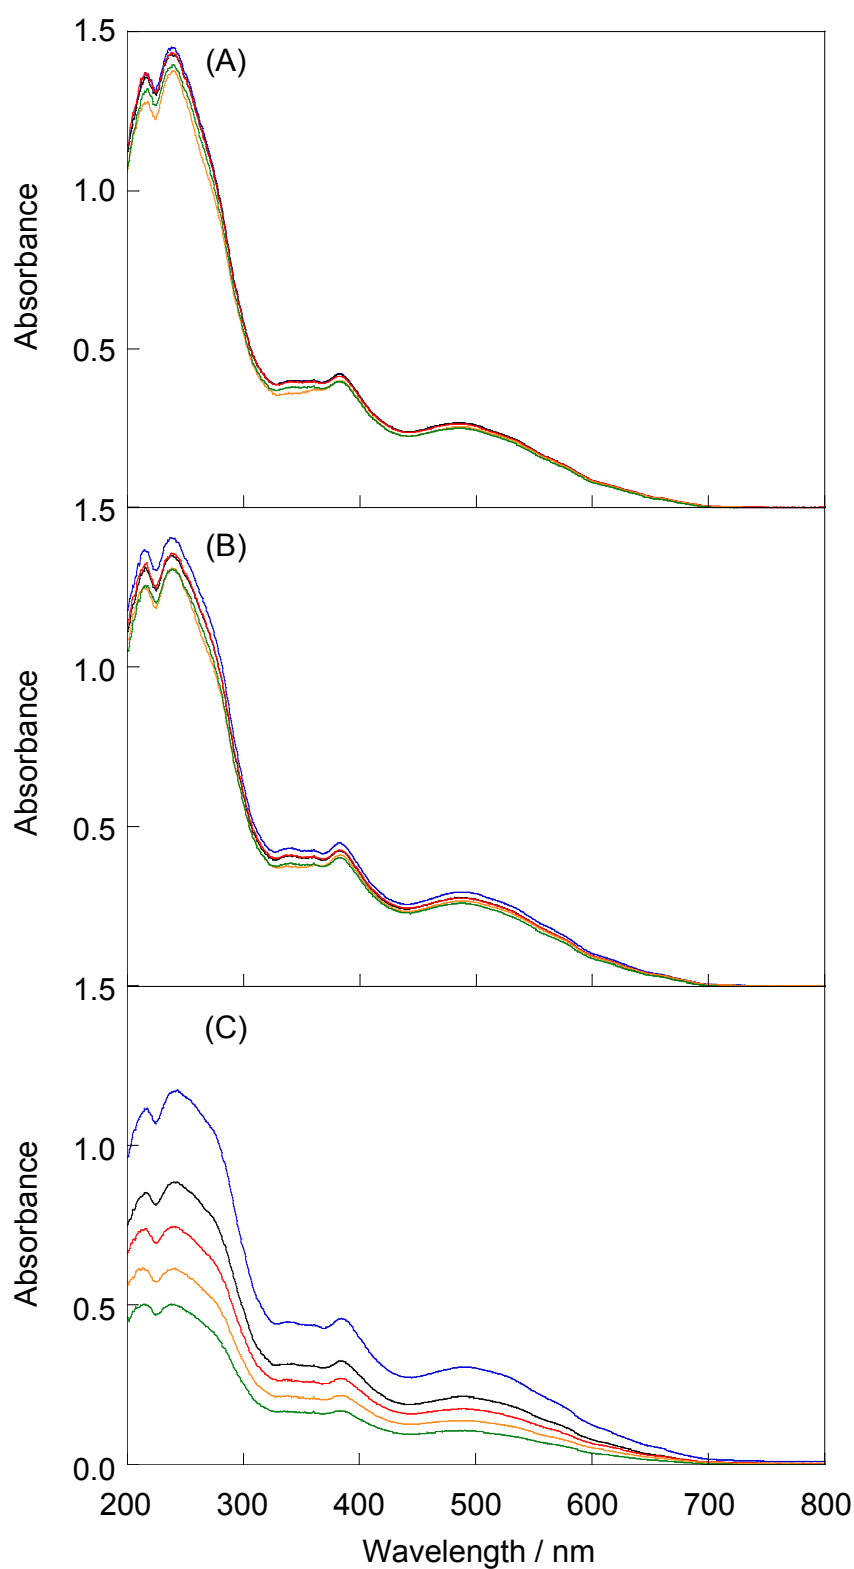

**Fig. S2** UV-vis absorption spectra of LMIC<sub>70</sub> in DMPC-liposomes prepared by the exchange reaction at (A) 80 °C, (B) 30 °C and (C) 0 °C after incubation times of 0 (blue line), 1 (black line), 24 (red line), 48 (orange line) and 72 h (green line).

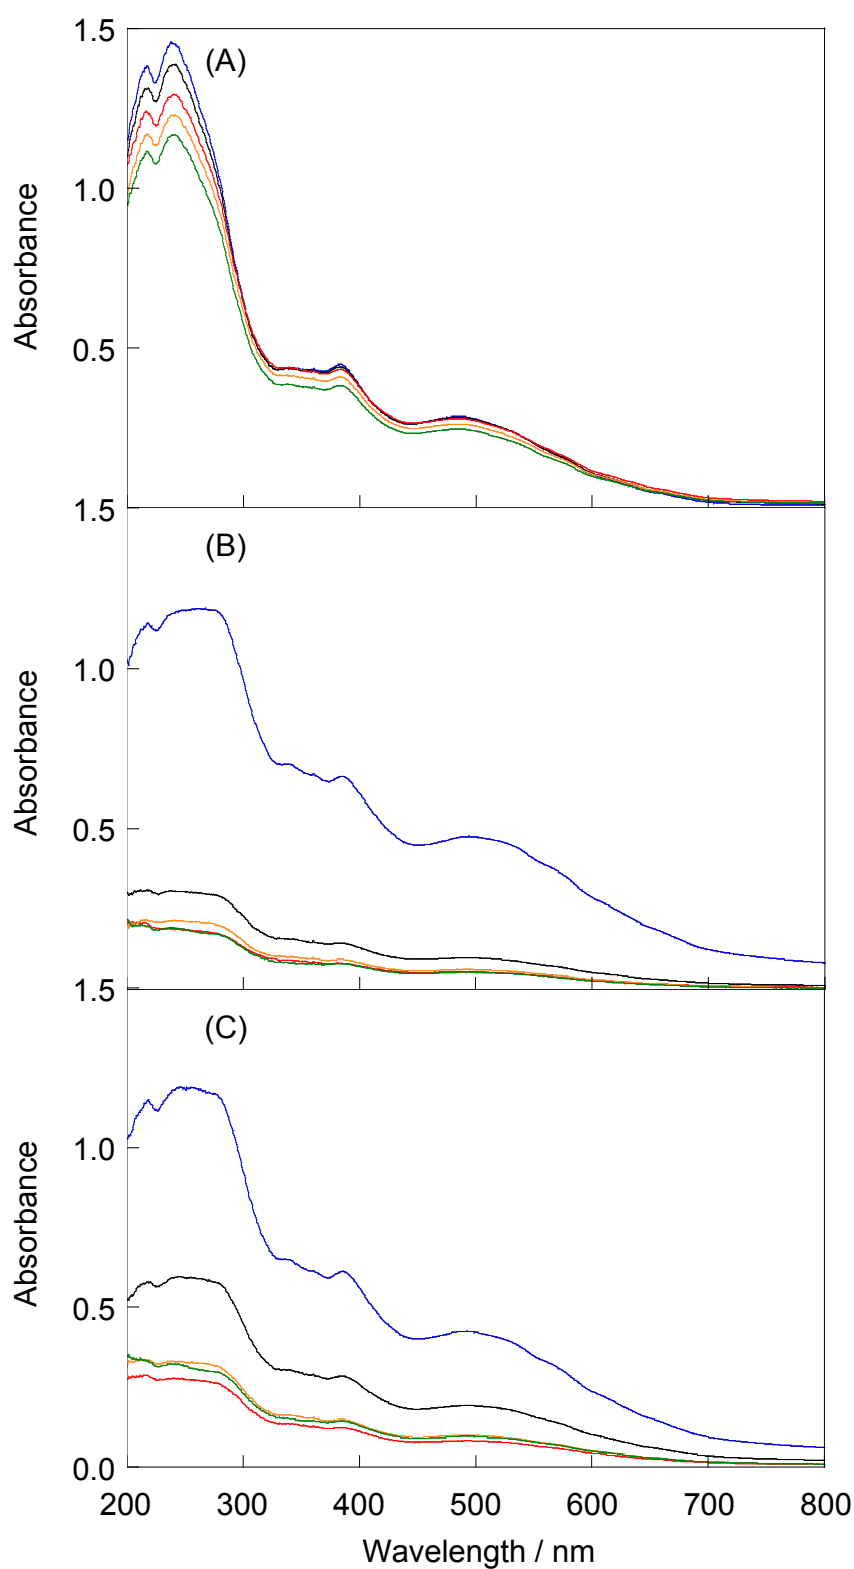

**Fig. S3** UV-vis absorption spectra of LMIC<sub>70</sub> in DPPC-liposomes prepared by the exchange reaction at (A) 80 °C, (B) 30 °C and (C) 0 °C after incubation times of 0 (blue line), 1 (black line), 24 (red line), 48 (orange line) and 72 h (green line).

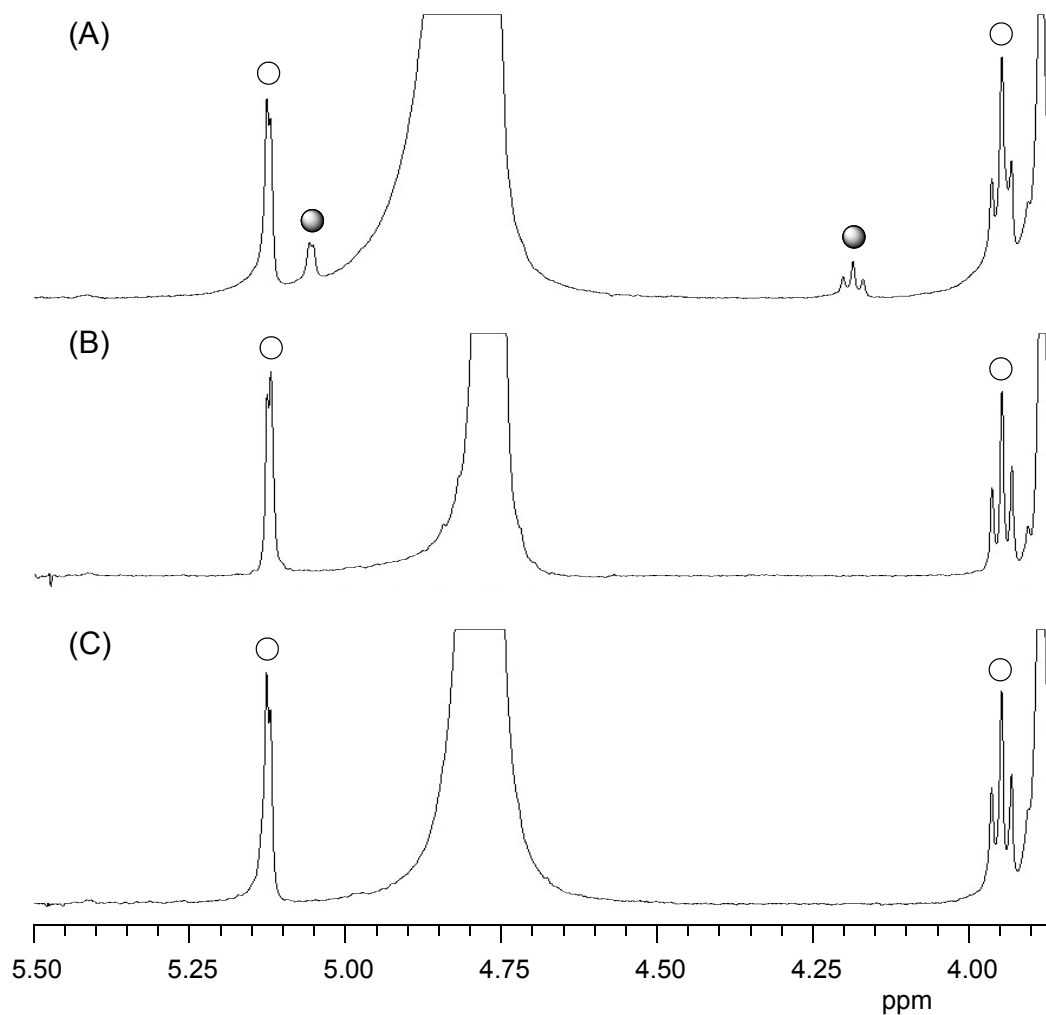

**Fig. S4**  $^1\text{H}$  NMR spectra at 600 MHz in  $\text{D}_2\text{O}$  at 25 °C of  $\gamma\text{-CDx}$  and the  $\text{C}_{60}\cdot\gamma\text{-CDx}$  complex ( $[\gamma\text{-CDx}] = 1.02$  mM,  $[\text{C}_{60}] = 0.10$  mM) (A) before the addition of liposomes and after heating at 80 °C for 1 h (B) in the presence of DMPC (1.00 mM) and in the presence of DPPC (○: free  $\gamma\text{-CDx}$ , ●: the  $\text{C}_{60}\cdot\gamma\text{-CDx}$  complex).

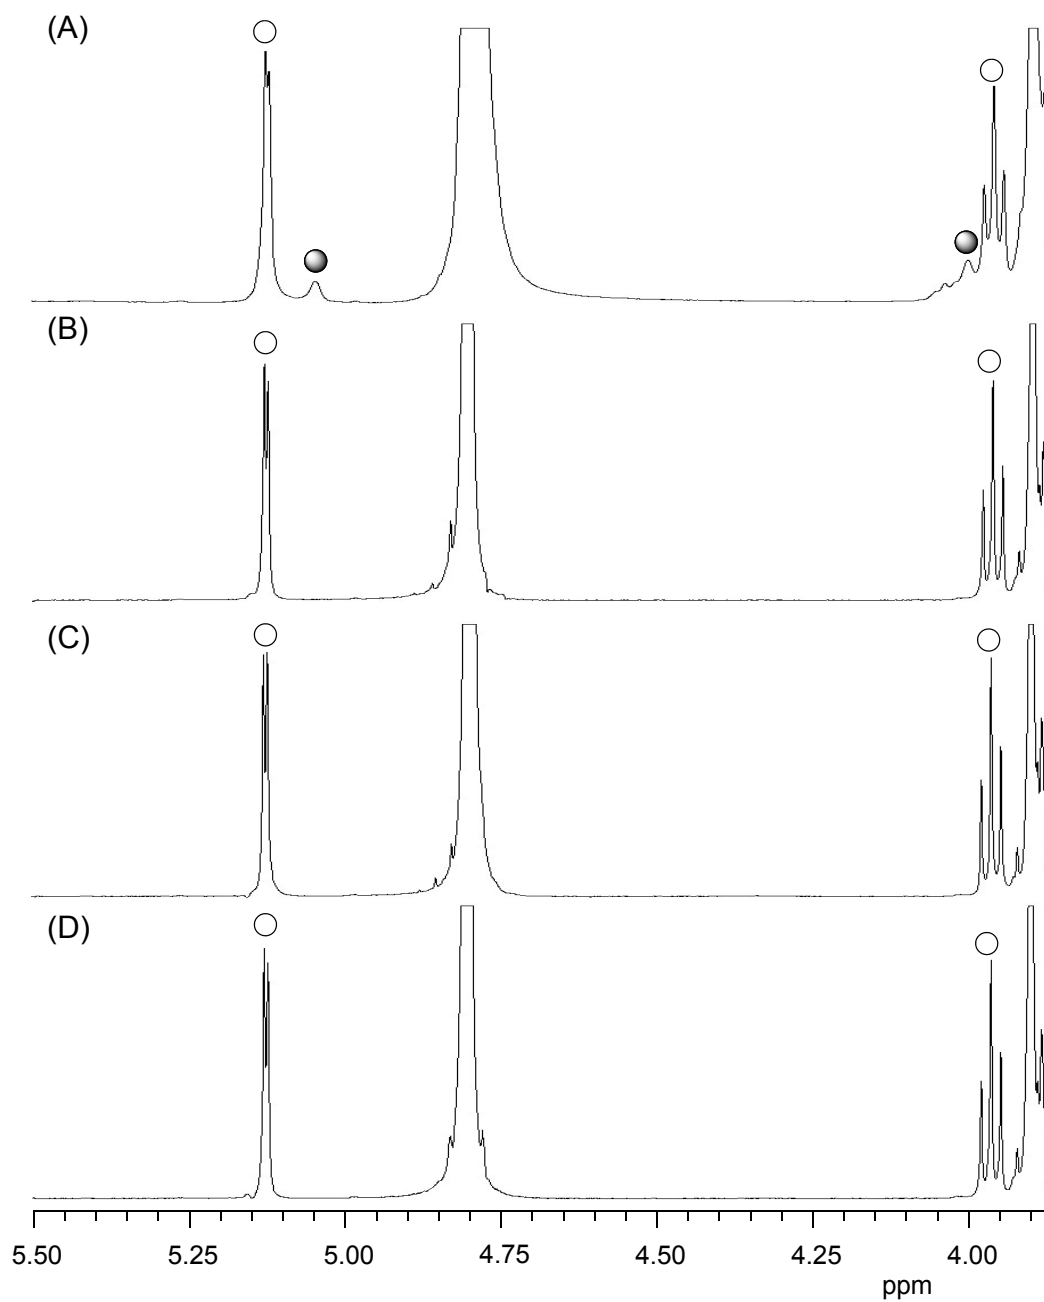

**Fig. S5** <sup>1</sup>H NMR spectra at 600 MHz in D<sub>2</sub>O at 25 °C of  $\gamma$ -CDx and the C<sub>70</sub>: $\gamma$ -CDx complex ( $[\gamma$ -CDx] = 1.90 mM, [C<sub>70</sub>] = 0.10 mM): (A) before the addition of liposomes and after mixing (B) at 80 °C, (C) at 30 °C and (D) at 0 °C for 10 min in the presence of DMPC (1.00 mM) (○: free  $\gamma$ -CDx, ●: C<sub>70</sub>: $\gamma$ -CDx complex).

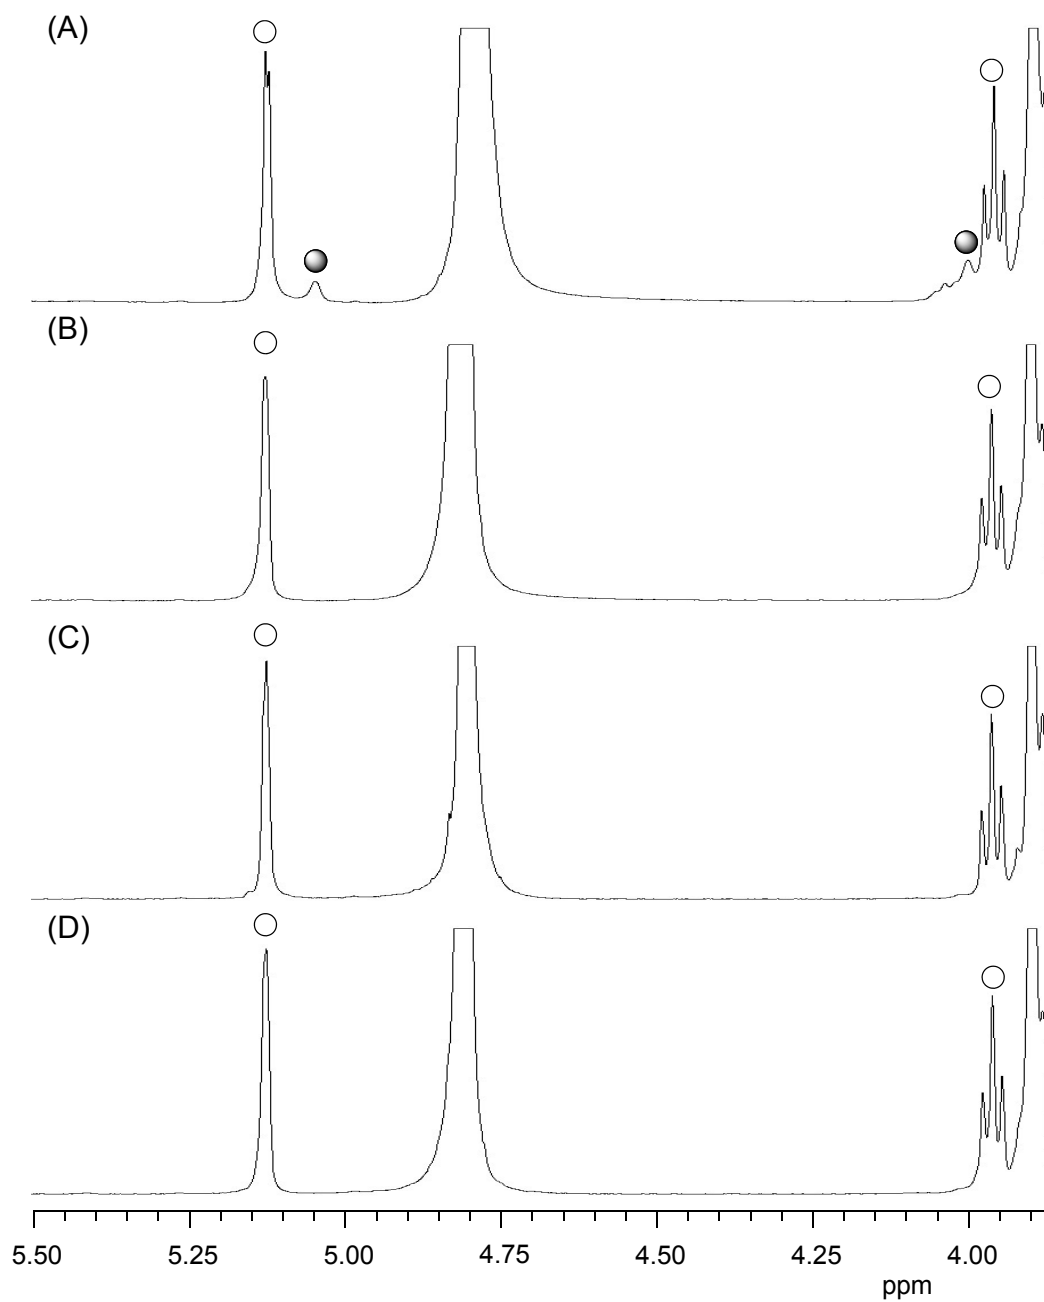

**Fig. S6** <sup>1</sup>H NMR spectra at 600 MHz in D<sub>2</sub>O at 25 °C of  $\gamma$ -CDx and the  $C_{70}$ : $\gamma$ -CDx complex ( $[\gamma\text{-CDx}] = 1.90$  mM,  $[C_{70}] = 0.10$  mM): (A) before the addition of liposomes and after mixing (B) at 80 °C, (C) at 30 °C and (D) at 0 °C for 10 min in the presence of DPPC (1.00 mM) (○: free  $\gamma$ -CDx, ●:  $C_{70}$ : $\gamma$ -CDx complex).

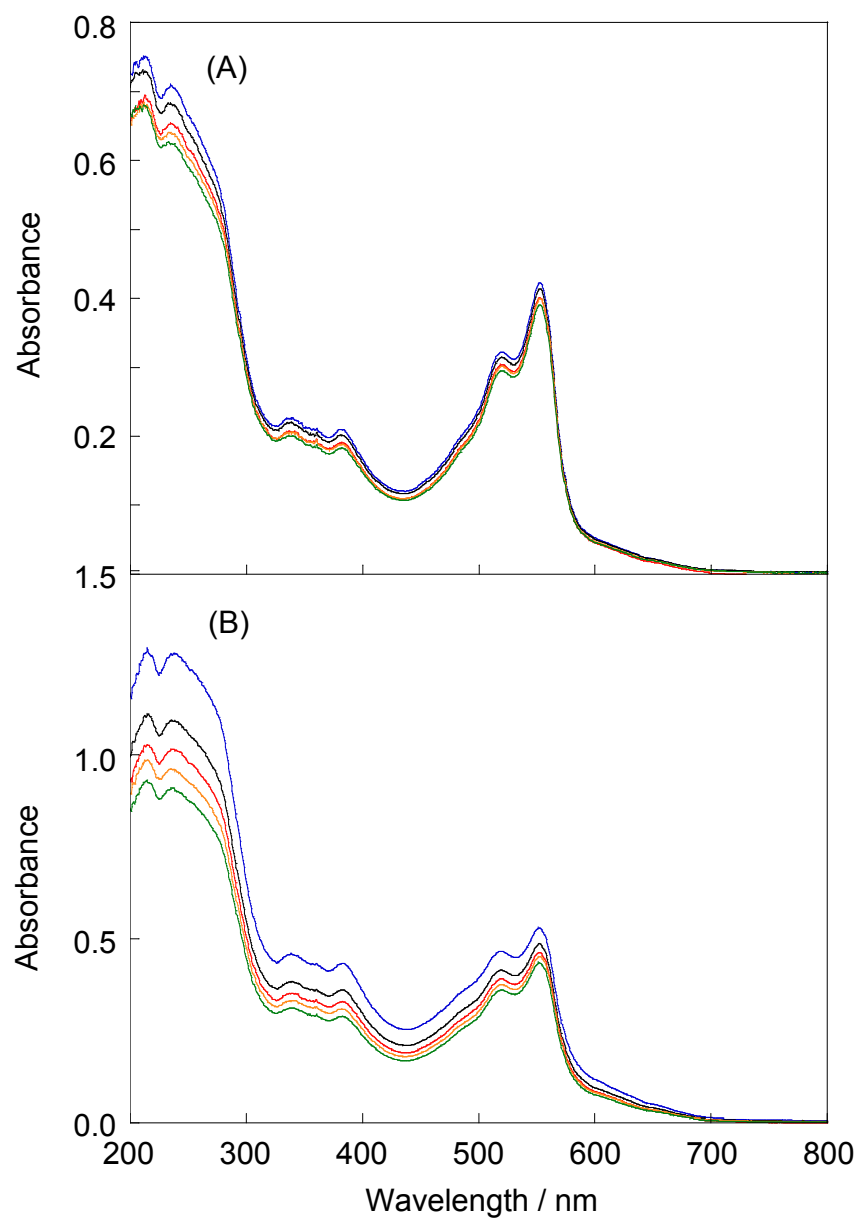

**Fig. S7** UV-vis absorption spectra of LMIC<sub>70</sub> of DPPC•DiI-liposomes at (A) 5 mol% C<sub>70</sub> and (B) 10 mol% C<sub>70</sub> prepared by the exchange reaction at 30 °C after incubation times of 0 (blue line), 1 (black line), 24 (red line), 48 (orange line) and 72 h (green line).



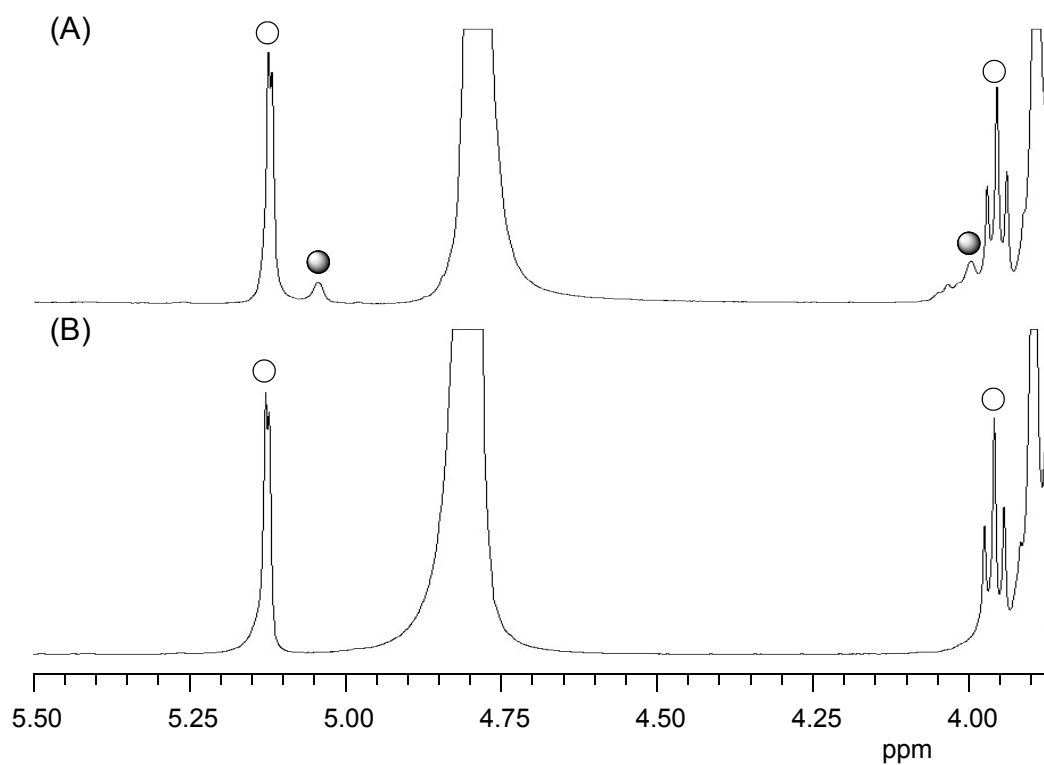

**Fig. S8** <sup>1</sup>H NMR spectra at 600 MHz in D<sub>2</sub>O at 25 °C of  $\gamma$ -CDx and the  $C_{70}$ · $\gamma$ -CDx complex ( $[\gamma\text{-CDx}] = 1.90$  mM,  $[C_{70}] = 0.10$  mM): (A) before the addition of liposomes and (B) after mixing at 30 °C for 10 min in the presence of DPPC (1.00 mM) and DiI (0.025 mM) (○: free  $\gamma$ -CDx, ●:  $C_{70}$ · $\gamma$ -CDx complex).

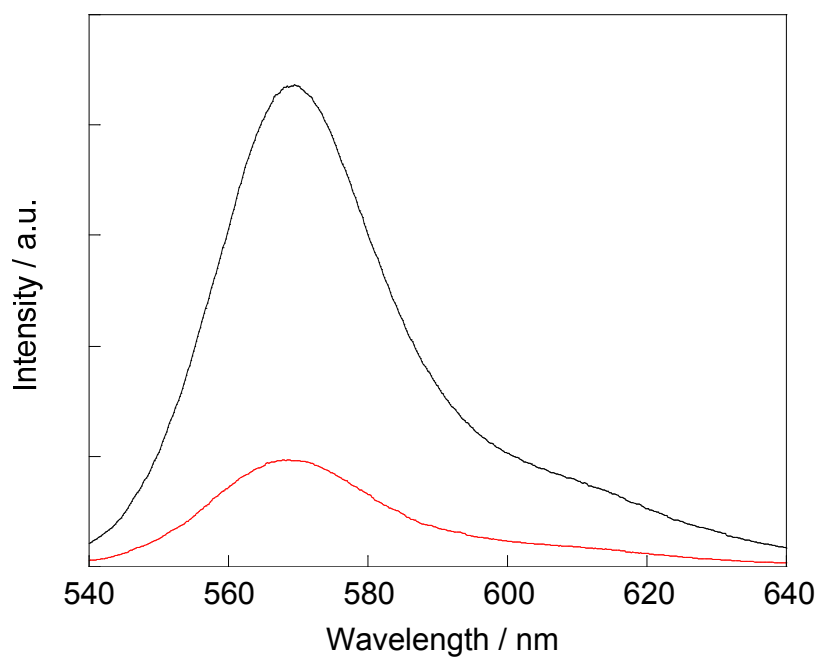

**Fig. S9** Fluorescence spectral change of DPPC•DiI-liposomes before (black line) and after (red line) the addition of the C<sub>70</sub>·γ-CDx complex ([DPPC] = 1.00 mM, [DiI] = 0.25 mM and [C<sub>70</sub>] = 0.10 mM) at 30 °C.

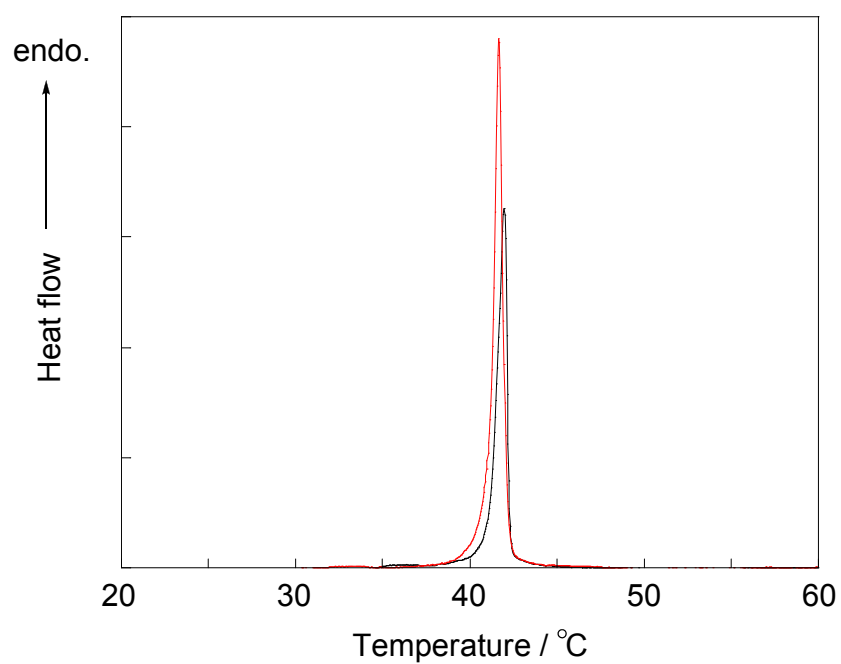

**Fig. S10** DSC curves of DPPC liposomes in the presence (red line) and absence (black line) of DiI in  $D_2O$ .
